# Supplementary material for: Upregulated expression of serum exosomal hsa_circ_0026611 is associated with lymph node metastasis and poor prognosis of esophageal squamous cell carcinoma
Source: PubMed Central journal article supplement (PMC7778553; doi:10.7150/jca.50548), 2021-01-01
Supplement: jcav12p0918s1.pdf [file jcav12p0918s1.pdf]

**Supplement table 1.** The baseline characteristics of ESCC.

| <b>Variables</b>                            | <b>n</b> | <b>%/M (P25, P75)</b> |
|---------------------------------------------|----------|-----------------------|
| Sex                                         |          |                       |
| Female                                      | 22       | 31.88                 |
| Man                                         | 47       | 68.12                 |
| Age                                         | 69       | 63.00(58.00,67.00)    |
| Tumor location                              |          |                       |
| Upper/middle                                | 40       | 57.97                 |
| Distal                                      | 29       | 42.03                 |
| Histologic grade                            |          |                       |
| G3/G2                                       | 58       | 84.06                 |
| G1                                          | 11       | 15.94                 |
| T stage                                     |          |                       |
| I-II                                        | 26       | 37.68                 |
| III                                         | 42       | 60.87                 |
| N stage                                     |          |                       |
| N <sub>0</sub>                              | 34       | 49.28                 |
| N <sub>+</sub>                              | 35       | 20.72                 |
| Postoperative radiotherapy and chemotherapy |          |                       |
| No                                          | 50       | 72.46                 |
| Yes                                         | 19       | 27.54                 |

**Supplement table 2.** The primers sequences of CircRNAs and GAPDH.

| <b>CircRNAs</b>  | <b>Forward</b>       | <b>Reverse</b>        |
|------------------|----------------------|-----------------------|
| hsa_circ_0026611 | CACTCCCCACATTCCCACCT | AGATTTCGTATGCGGACGGGT |
| hsa_circ_0126925 | AGCAAGTCCTAAGCGTGGGC | GCTGCATCCACATCTGCACC  |
| hsa_circ_0133794 | AGGTCTTCACCACCATGGCC | TGTGACAAGGTAGCACAGCGA |
| hsa_circ_0081144 | TTCGTGGTCCTCGTGGTGAC | CCAGAAGGACCTCGGCTTCC  |
| GAPDH            | GAACGGGAAGCTCACTG    | GCCTGCTTCACCACCTTCT   |

**Supplement table 3.** The four serum exosomal circRNAs expression levels in ESCC.

| <b>CircRNAs</b>  | <b>LNM group(n=10)</b>                 | <b>Non-LNM group (n=10)</b>            | <b>Z</b> | <b>P</b> |
|------------------|----------------------------------------|----------------------------------------|----------|----------|
|                  | M (P <sub>25</sub> , P <sub>75</sub> ) | M (P <sub>25</sub> , P <sub>75</sub> ) |          |          |
| hsa_circ_0026611 | 4.15(2.00,13.54)                       | 0.53(0.44,1.14)                        | -2.797   | <0.01    |
| hsa_circ_0126925 | 1.74(0.66,3.46)                        | 1.19(0.20,2.70)                        | -0.756   | 0.45     |
| hsa_circ_0133794 | 11.00(0.44,35.74)                      | 0.36(0.03,16.69)                       | -1.029   | 0.23     |
| hsa_circ_0081144 | 7.30(1.37,17.07)                       | 0.46(0.25,4.58)                        | -2.041   | 0.04     |

**Supplement table 4.** The serum exosomal hsa\_circ\_0026611、exosomal hsa\_circ\_0081144 expression levels in ESCC.

| CircRNAs         | LNM group (n=35)                       | Non-LNM group (n=34)                   | Z      | P     |
|------------------|----------------------------------------|----------------------------------------|--------|-------|
|                  | M (P <sub>25</sub> , P <sub>75</sub> ) | M (P <sub>25</sub> , P <sub>75</sub> ) |        |       |
| hsa_circ_0026611 | 2.30(0.72,3.57)                        | 0.56(0.34,1.75)                        | -3.205 | <0.01 |
| hsa_circ_0081144 | 4.65(0.14,15.33)                       | 1.14(0.25,4.11)                        | -1.698 | 0.09  |

**Supplement figures**

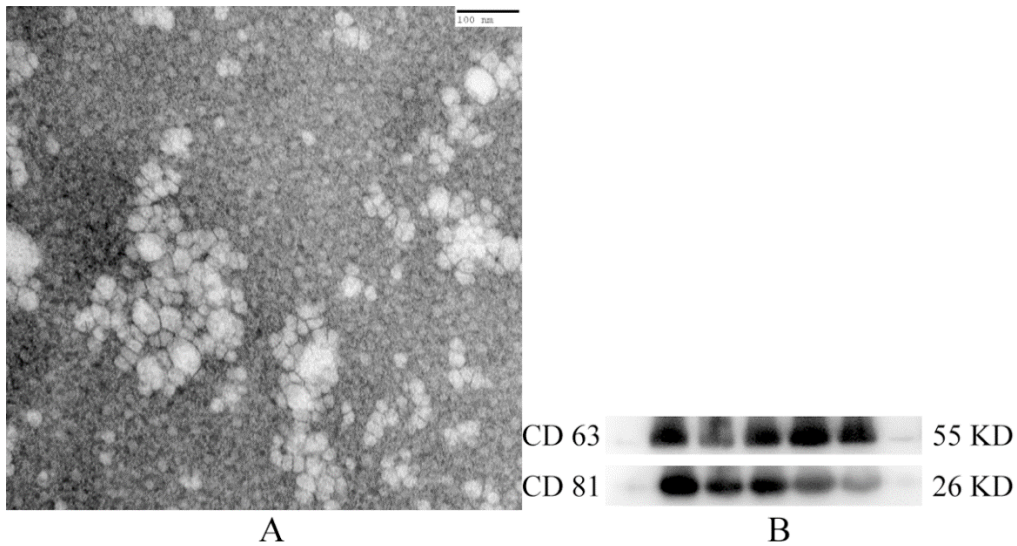

Supplement figure 1. A. Serum exosome were observed under transmission electron microscopy. B. The CD63, CD81 expression levels were analyzed using western blot.

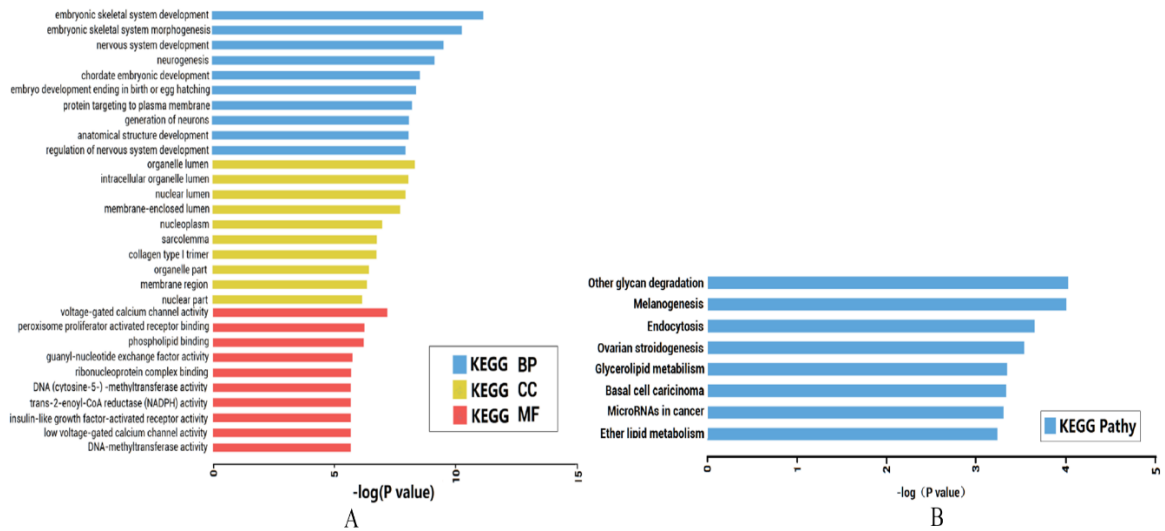

Supplement figure 2. GO functional enrichment analysis and KEGG pathway enrichment analysis of differentially expressed circRNAs.
